# Supplementary material
Source: PubMed Central journal article supplement (PMC3328412)
Supplement: NIHMS356841-supplement-1_si_001.pdf [file NIHMS356841-supplement-1_si_001.pdf]

# Testing the Promiscuity of Commercial Kinase Inhibitors Against the AGC Kinase Group Using a Split-luciferase Screen

*Benjamin W. Jester, Alicia Gaj, Carolyn D. Shomin, Kurt J. Cox and Indraneel Ghosh\**

Department of Chemistry and Biochemistry, University of Arizona, 1306 East University Blvd, Tucson,  
AZ 85721

ghosh@email.arizona.edu

## Contents

Table S1: List of the kinases and other constructs used in this study.

Table S2: Full table of normalized % inhibition values for 72 inhibitors against 27 protein kinases.

Figure S1: Structures of the small molecules found to exhibit activity against luciferase.

Table S3: Pairwise percent identity scores for the kinase domain of all kinases tested.

Table S4: Kinase domain  $F$  values calculated for each kinase.

Table S5: Pairwise percent identity scores for active site pseudosequences of all kinases tested.

Table S6: Active site  $F$  values calculated for each kinase.

**Table S1.** Kinase and luciferase constructs

| Construct | Reference                                               |
|-----------|---------------------------------------------------------|
| Nfluc     | Porter, J. <i>et al</i> JACS, <b>130</b> , 6488 (2008). |
| Cfluc     | Porter, J. <i>et al</i> JACS, <b>130</b> , 6488 (2008). |
| Fos-Nfluc | Porter, J. <i>et al</i> JACS, <b>130</b> , 6488 (2008). |
| Cfluc-Jun | Porter, J. <i>et al</i> JACS, <b>130</b> , 6488 (2008). |

| Kinase         | NCBI Ref.Seq. |
|----------------|---------------|
| AKT1           | NP_005154.2   |
| AKT2           | NP_001617.1   |
| AKT3           | NP_005456.1   |
| DMPK           | NP_004400.4   |
| MSK1           | NP_872198.1   |
| MSK2           | NP_003933.1   |
| PDPK1          | NP_002604.1   |
| PKA            | NP_032880.1   |
| PKA $\beta$    | NP_891993.1   |
| PKC $\delta$   | NP_997704.1   |
| PKC $\epsilon$ | NP_005391.1   |
| PKC $\gamma$   | NP_002730.1   |
| PKC $\eta$     | NP_006246.2   |
| PKC $\theta$   | NP_006248.1   |
| PKG1           | NP_006249.1   |
| PKN1           | NP_998725.1   |
| PRKX           | NP_005035.1   |
| RSK1           | NP_002944.2   |
| RSK2           | NP_004577.1   |
| RSK3           | NP_066958.2   |
| RSK4           | NP_055311.1   |
| SGK2           | NP_733794.1   |
| SGK3           | NP_037389.4   |
| STK32B         | NP_060871.1   |
| AURKA          | NP_060370.1   |
| AURKB          | NP_004208.2   |
| AURKC          | NP_003151.2   |

**Table S2.** Normalized % inhibition values for 72 inhibitors, each tested at 10  $\mu$ M, against 27 protein kinases.

| Inhibitor Name       | Cmpd # | AKT1 | AKT2 | AKT3 | AURKA | AURKB | AURKC | DMPK | MSK1 | MSK2 | PDPK1 | PKA | PKA $\beta$ | PKC $\delta$ | PKC $\epsilon$ |
|----------------------|--------|------|------|------|-------|-------|-------|------|------|------|-------|-----|-------------|--------------|----------------|
| SB 218078            | 3      | 78%  | 56%  | 45%  | 12%   | 60%   | 45%   | 37%  | 73%  | 77%  | 29%   | 65% | 71%         | 58%          | 59%            |
| PKC-412              | 4      | 55%  | 41%  | 31%  | 26%   | 44%   | 38%   | 29%  | 66%  | 70%  | 10%   | 63% | 81%         | 52%          | 57%            |
| Ro 31-8220           | 5      | 62%  | 28%  | 78%  | 2%    | 13%   | 10%   | 76%  | 64%  | 56%  | 2%    | 62% | 73%         | 91%          | 71%            |
| GF 109203X           | 6      | 5%   | 0%   | 37%  | 2%    | 0%    | 0%    | 34%  | 39%  | 30%  | 0%    | 26% | 34%         | 52%          | 37%            |
| Arctriaflavin A      | 7      | 22%  | 0%   | 0%   | 1%    | 50%   | 35%   | 30%  | 47%  | 55%  | 22%   | 27% | 20%         | 17%          | 25%            |
| PD 407824            | 8      | 0%   | 0%   | 0%   | 0%    | 34%   | 24%   | 15%  | 45%  | 62%  | 48%   | 10% | 3%          | 12%          | 5%             |
| CGP 53353            | 9      | 15%  | 0%   | 0%   | 0%    | 3%    | 0%    | 30%  | 0%   | 0%   | 10%   | 13% | 8%          | 0%           | 0%             |
| Sunitinib            | 10     | 28%  | 36%  | 26%  | 0%    | 22%   | 30%   | 0%   | 76%  | 86%  | 10%   | 2%  | 0%          | 0%           | 22%            |
| H-89                 | 11     | 21%  | 0%   | 15%  | 0%    | 2%    | 12%   | 0%   | 0%   | 10%  | 0%    | 67% | 75%         | 10%          | 9%             |
| Fasudil              | 12     | 0%   | 0%   | 0%   | 0%    | 0%    | 6%    | 0%   | 0%   | 0%   | 0%    | 35% | 16%         | 1%           | 0%             |
| HA-1100              | 13     | 0%   | 0%   | 0%   | 0%    | 14%   | 5%    | 0%   | 0%   | 0%   | 0%    | 19% | 0%          | 0%           | 0%             |
| ML-9                 | 14     | 2%   | 0%   | 0%   | 0%    | 13%   | 0%    | 0%   | 0%   | 0%   | 0%    | 3%  | 0%          | 0%           | 0%             |
| Y-27632              | 15     | 0%   | 0%   | 0%   | 0%    | 0%    | 5%    | 0%   | 0%   | 0%   | 0%    | 2%  | 0%          | 2%           | 1%             |
| PP1                  | 16     | 2%   | 0%   | 0%   | 0%    | 0%    | 0%    | 28%  | 0%   | 1%   | 0%    | 19% | 0%          | 0%           | 8%             |
| PP2                  | 17     | 0%   | 0%   | 0%   | 0%    | 0%    | 6%    | 26%  | 1%   | 0%   | 0%    | 30% | 8%          | 0%           | 0%             |
| 1-naphthyl PP1       | 18     | 18%  | 0%   | 0%   | 0%    | 12%   | 17%   | 27%  | 0%   | 0%   | 0%    | 32% | 21%         | 0%           | 14%            |
| CGP 57380            | 19     | 3%   | 0%   | 0%   | 0%    | 14%   | 16%   | 2%   | 0%   | 0%   | 0%    | 9%  | 1%          | 0%           | 6%             |
| IKK 16               | 20     | 0%   | 0%   | 0%   | 19%   | 32%   | 15%   | 18%  | 0%   | 0%   | 9%    | 12% | 12%         | 4%           | 40%            |
| Purvalanol A         | 21     | 0%   | 0%   | 0%   | 0%    | 0%    | 0%    | 11%  | 2%   | 12%  | 0%    | 7%  | 0%          | 0%           | 2%             |
| Purvalanol B         | 22     | 0%   | 0%   | 0%   | 3%    | 15%   | 7%    | 0%   | 0%   | 44%  | 0%    | 21% | 3%          | 5%           | 2%             |
| Aminopurvalanol A    | 23     | 0%   | 0%   | 0%   | 0%    | 0%    | 0%    | 7%   | 18%  | 39%  | 0%    | 13% | 1%          | 6%           | 6%             |
| Ki 8751              | 24     | 6%   | 0%   | 0%   | 41%   | 71%   | 80%   | 13%  | 43%  | 23%  | 0%    | 16% | 5%          | 0%           | 0%             |
| ZM 447439            | 25     | 9%   | 0%   | 0%   | 13%   | 55%   | 66%   | 9%   | 0%   | 0%   | 0%    | 7%  | 0%          | 0%           | 0%             |
| SD 208               | 26     | 39%  | 26%  | 35%  | 0%    | 12%   | 8%    | 18%  | 24%  | 8%   | 12%   | 21% | 19%         | 10%          | 27%            |
| TPCA-1               | 27     | 0%   | 0%   | 0%   | 1%    | 56%   | 31%   | 0%   | 0%   | 16%  | 0%    | 4%  | 0%          | 0%           | 19%            |
| PHA 665752           | 28     | 8%   | 0%   | 0%   | 19%   | 33%   | 39%   | 9%   | 22%  | 12%  | 7%    | 1%  | 13%         | 0%           | 7%             |
| GW 843682X           | 29     | 12%  | 0%   | 0%   | 2%    | 39%   | 28%   | 18%  | 0%   | 14%  | 2%    | 14% | 12%         | 4%           | 12%            |
| Flavopiridol         | 30     | 1%   | 0%   | 0%   | 12%   | 0%    | 28%   | 6%   | 16%  | 23%  | 0%    | 5%  | 0%          | 15%          | 0%             |
| GW 5074              | 31     | 19%  | 0%   | 0%   | 0%    | 26%   | 0%    | 11%  | 13%  | 4%   | 0%    | 9%  | 11%         | 2%           | 10%            |
| LY 364947            | 32     | 0%   | 0%   | 0%   | 0%    | 25%   | 6%    | 3%   | 0%   | 0%   | 0%    | 1%  | 0%          | 0%           | 5%             |
| Gefitinib            | 33     | 0%   | 0%   | 0%   | 0%    | 27%   | 19%   | 13%  | 0%   | 0%   | 2%    | 1%  | 0%          | 0%           | 7%             |
| (-)-terreic acid     | 34     | 0%   | 0%   | 0%   | 0%    | 0%    | 0%    | 0%   | 2%   | 0%   | 2%    | 0%  | 0%          | 0%           | 0%             |
| SB 239063            | 35     | 0%   | 0%   | 0%   | 4%    | 6%    | 0%    | 0%   | 0%   | 0%   | 0%    | 0%  | 1%          | 6%           | 0%             |
| SB 203580            | 36     | 11%  | 0%   | 0%   | 6%    | 0%    | 0%    | 0%   | 0%   | 0%   | 3%    | 0%  | 0%          | 0%           | 0%             |
| Ro 08-2750           | 37     | 24%  | 0%   | 0%   | 5%    | 3%    | 12%   | 0%   | 8%   | 0%   | 0%    | 11% | 21%         | 31%          | 13%            |
| Rottlerin            | 38     | 24%  | 0%   | 0%   | 5%    | 10%   | 8%    | 23%  | 0%   | 0%   | 0%    | 16% | 22%         | 6%           | 14%            |
| SB 415286            | 39     | 0%   | 0%   | 0%   | 6%    | 12%   | 23%   | 0%   | 0%   | 0%   | 0%    | 0%  | 5%          | 9%           | 4%             |
| SB 216763            | 40     | 3%   | 0%   | 0%   | 3%    | 0%    | 0%    | 8%   | 0%   | 0%   | 0%    | 5%  | 8%          | 5%           | 3%             |
| Roscovitine          | 41     | 0%   | 0%   | 0%   | 0%    | 0%    | 0%    | 0%   | 0%   | 0%   | 0%    | 0%  | 0%          | 2%           | 0%             |
| Olomoucine           | 42     | 5%   | 0%   | 0%   | 0%    | 4%    | 0%    | 0%   | 0%   | 0%   | 0%    | 5%  | 0%          | 3%           | 0%             |
| API-2                | 43     | 0%   | 0%   | 0%   | 9%    | 3%    | 0%    | 0%   | 0%   | 0%   | 0%    | 0%  | 0%          | 4%           | 0%             |
| TBB                  | 44     | 0%   | 0%   | 0%   | 6%    | 2%    | 1%    | 0%   | 0%   | 0%   | 0%    | 0%  | 1%          | 0%           | 0%             |
| Arctigenin           | 45     | 0%   | 0%   | 0%   | 11%   | 0%    | 6%    | 0%   | 0%   | 0%   | 0%    | 0%  | 1%          | 0%           | 0%             |
| ER 27319             | 46     | 3%   | 0%   | 0%   | 7%    | 9%    | 6%    | 0%   | 0%   | 0%   | 0%    | 0%  | 0%          | 0%           | 0%             |
| 10-DEBC              | 47     | 0%   | 0%   | 0%   | 0%    | 8%    | 16%   | 7%   | 0%   | 0%   | 0%    | 0%  | 0%          | 0%           | 3%             |
| SP 600125            | 48     | 0%   | 0%   | 0%   | 0%    | 6%    | 0%    | 0%   | 0%   | 0%   | 0%    | 0%  | 0%          | 0%           | 0%             |
| ZM 336372            | 49     | 0%   | 0%   | 0%   | 3%    | 0%    | 8%    | 0%   | 0%   | 0%   | 0%    | 7%  | 0%          | 1%           | 0%             |
| ZM 39923             | 50     | 0%   | 0%   | 0%   | 0%    | 0%    | 0%    | 0%   | 2%   | 0%   | 1%    | 1%  | 0%          | 0%           | 0%             |
| ZM 449829            | 51     | 0%   | 0%   | 0%   | 0%    | 0%    | 0%    | 0%   | 0%   | 0%   | 0%    | 0%  | 0%          | 0%           | 0%             |
| GW 583340            | 52     | 16%  | 0%   | 0%   | 13%   | 0%    | 21%   | 5%   | 0%   | 6%   | 0%    | 8%  | 5%          | 0%           | 14%            |
| hexabromocyclohexane | 53     | 0%   | 0%   | 0%   | 4%    | 0%    | 0%    | 0%   | 0%   | 0%   | 0%    | 12% | 0%          | 1%           | 0%             |
| U0126                | 54     | 0%   | 0%   | 0%   | 0%    | 0%    | 0%    | 0%   | 0%   | 0%   | 0%    | 0%  | 0%          | 0%           | 0%             |
| AG 213               | 55     | 0%   | 0%   | 0%   | 1%    | 0%    | 0%    | 0%   | 0%   | 0%   | 0%    | 4%  | 0%          | 0%           | 0%             |
| AG 490               | 56     | 0%   | 0%   | 0%   | 0%    | 0%    | 10%   | 0%   | 0%   | 0%   | 0%    | 3%  | 0%          | 2%           | 0%             |
| LFM-A13              | 57     | 0%   | 0%   | 0%   | 0%    | 0%    | 0%    | 0%   | 0%   | 0%   | 0%    | 7%  | 0%          | 0%           | 0%             |
| SL 327               | 58     | 0%   | 0%   | 0%   | 0%    | 1%    | 0%    | 0%   | 0%   | 0%   | 0%    | 2%  | 0%          | 1%           | 0%             |
| IMD 0354             | 59     | 0%   | 0%   | 0%   | 0%    | 9%    | 0%    | 3%   | 0%   | 0%   | 0%    | 0%  | 1%          | 0%           | 11%            |
| D 4476               | 60     | 2%   | 0%   | 0%   | 0%    | 0%    | 2%    | 7%   | 2%   | 0%   | 0%    | 0%  | 3%          | 0%           | 1%             |
| SB 431542            | 61     | 1%   | 0%   | 0%   | 11%   | 0%    | 0%    | 4%   | 8%   | 0%   | 0%    | 0%  | 0%          | 0%           | 0%             |
| SB 202190            | 62     | 5%   | 0%   | 0%   | 0%    | 0%    | 21%   | 0%   | 0%   | 0%   | 0%    | 11% | 0%          | 7%           | 0%             |
| SC 514               | 63     | 0%   | 0%   | 0%   | 0%    | 0%    | 0%    | 0%   | 0%   | 0%   | 0%    | 0%  | 2%          | 0%           | 0%             |
| PQ 401               | 64     | 0%   | 0%   | 0%   | 0%    | 14%   | 16%   | 6%   | 3%   | 0%   | 0%    | 5%  | 0%          | 0%           | 0%             |
| CGK 733              | 65     | 5%   | 0%   | 0%   | 0%    | 0%    | 3%    | 0%   | 2%   | 0%   | 0%    | 0%  | 7%          | 0%           | 16%            |
| ZM 323881            | 66     | 0%   | 0%   | 0%   | 0%    | 1%    | 0%    | 0%   | 0%   | 0%   | 2%    | 2%  | 0%          | 0%           | 6%             |
| ZM 306416            | 67     | 0%   | 0%   | 0%   | 7%    | 9%    | 18%   | 0%   | 0%   | 2%   | 0%    | 2%  | 4%          | 0%           | 2%             |
| BIBX 1382            | 68     | 0%   | 0%   | 0%   | 0%    | 8%    | 10%   | 3%   | 0%   | 0%   | 0%    | 6%  | 0%          | 0%           | 0%             |
| LY 294002            | 69     | 0%   | 0%   | 0%   | 0%    | 0%    | 0%    | 0%   | 4%   | 0%   | 0%    | 0%  | 0%          | 0%           | 0%             |
| NU 7026              | 70     | 0%   | 0%   | 0%   | 0%    | 7%    | 14%   | 0%   | 1%   | 0%   | 0%    | 0%  | 0%          | 0%           | 6%             |
| PI 828               | 71     | 2%   | 0%   | 0%   | 2%    | 7%    | 14%   | 4%   | 2%   | 3%   | 0%    | 0%  | 0%          | 0%           | 4%             |
| Compound 401         | 72     | 0%   | 0%   | 0%   | 0%    | 0%    | 5%    | 0%   | 0%   | 0%   | 0%    | 0%  | 0%          | 0%           | 6%             |
| EO 1428              | 73     | 0%   | 0%   | 0%   | 0%    | 0%    | 0%    | 0%   | 0%   | 0%   | 0%    | 4%  | 0%          | 0%           | 12%            |
| PD 198306            | 74     | 0%   | 0%   | 0%   | 0%    | 4%    | 0%    | 20%  | 0%   | 0%   | 0%    | 0%  | 0%          | 0%           | 9%             |

| Inhibitor Name       | Cmpd # | PKC $\gamma$ | PKC $\eta$ | PKC $\theta$ | PKG1 | PKN1 | PRKX | RSK1 | RSK2 | RSK3 | RSK4 | SGK2 | SGK3 | STK32B |
|----------------------|--------|--------------|------------|--------------|------|------|------|------|------|------|------|------|------|--------|
| SB 218078            | 3      | 45%          | 78%        | 82%          | 28%  | 10%  | 79%  | 81%  | 77%  | 81%  | 80%  | 87%  | 85%  | 12%    |
| PKC-412              | 4      | 52%          | 60%        | 55%          | 65%  | 23%  | 71%  | 56%  | 79%  | 70%  | 75%  | 22%  | 43%  | 56%    |
| Ro 31-8220           | 5      | 47%          | 81%        | 93%          | 63%  | 36%  | 32%  | 71%  | 87%  | 89%  | 80%  | 34%  | 65%  | 63%    |
| GF 109203X           | 6      | 11%          | 77%        | 69%          | 35%  | 5%   | 10%  | 40%  | 33%  | 59%  | 32%  | 0%   | 2%   | 29%    |
| Arctriafavin A       | 7      | 7%           | 65%        | 45%          | 0%   | 0%   | 62%  | 51%  | 23%  | 42%  | 36%  | 70%  | 81%  | 9%     |
| PD 407824            | 8      | 0%           | 44%        | 42%          | 0%   | 0%   | 22%  | 49%  | 28%  | 78%  | 27%  | 26%  | 37%  | 0%     |
| CGP 53353            | 9      | 22%          | 1%         | 12%          | 0%   | 0%   | 8%   | 0%   | 3%   | 0%   | 0%   | 0%   | 12%  | 19%    |
| Sumitinib            | 10     | 0%           | 39%        | 7%           | 22%  | 0%   | 25%  | 86%  | 59%  | 69%  | 69%  | 44%  | 42%  | 0%     |
| H-89                 | 11     | 0%           | 34%        | 40%          | 80%  | 0%   | 87%  | 0%   | 5%   | 0%   | 5%   | 20%  | 41%  | 17%    |
| Fasudil              | 12     | 0%           | 17%        | 1%           | 38%  | 0%   | 77%  | 2%   | 0%   | 0%   | 0%   | 1%   | 0%   | 0%     |
| HA-1100              | 13     | 0%           | 0%         | 15%          | 37%  | 6%   | 53%  | 0%   | 0%   | 0%   | 0%   | 0%   | 0%   | 0%     |
| ML-9                 | 14     | 0%           | 0%         | 0%           | 1%   | 1%   | 25%  | 0%   | 0%   | 1%   | 0%   | 0%   | 0%   | 0%     |
| Y-27632              | 15     | 0%           | 18%        | 33%          | 31%  | 0%   | 51%  | 0%   | 0%   | 0%   | 0%   | 1%   | 0%   | 0%     |
| PP1                  | 16     | 0%           | 8%         | 0%           | 0%   | 0%   | 0%   | 27%  | 8%   | 1%   | 14%  | 0%   | 0%   | 58%    |
| PP2                  | 17     | 0%           | 4%         | 0%           | 0%   | 0%   | 0%   | 7%   | 6%   | 4%   | 7%   | 0%   | 0%   | 43%    |
| 1-naphthyl PP1       | 18     | 5%           | 8%         | 31%          | 0%   | 0%   | 9%   | 24%  | 30%  | 10%  | 4%   | 0%   | 0%   | 66%    |
| CGP 57380            | 19     | 0%           | 13%        | 17%          | 0%   | 1%   | 24%  | 0%   | 0%   | 0%   | 0%   | 9%   | 23%  | 42%    |
| IKK 16               | 20     | 13%          | 83%        | 38%          | 0%   | 0%   | 29%  | 4%   | 2%   | 0%   | 10%  | 69%  | 62%  | 8%     |
| Purvalanol A         | 21     | 0%           | 0%         | 0%           | 0%   | 0%   | 0%   | 65%  | 41%  | 48%  | 19%  | 0%   | 0%   | 4%     |
| Purvalanol B         | 22     | 0%           | 2%         | 11%          | 0%   | 0%   | 3%   | 81%  | 66%  | 79%  | 50%  | 0%   | 3%   | 9%     |
| Aminopurvalanol A    | 23     | 0%           | 10%        | 29%          | 0%   | 0%   | 6%   | 83%  | 77%  | 79%  | 55%  | 2%   | 5%   | 20%    |
| Ki 8751              | 24     | 3%           | 0%         | 20%          | 0%   | 10%  | 12%  | 0%   | 12%  | 32%  | 21%  | 17%  | 12%  | 0%     |
| ZM 447439            | 25     | 6%           | 0%         | 0%           | 0%   | 2%   | 7%   | 5%   | 0%   | 2%   | 3%   | 0%   | 0%   | 1%     |
| SD 208               | 26     | 10%          | 43%        | 51%          | 8%   | 0%   | 12%  | 18%  | 12%  | 5%   | 13%  | 22%  | 14%  | 15%    |
| TPCA-1               | 27     | 0%           | 56%        | 18%          | 0%   | 0%   | 9%   | 44%  | 7%   | 20%  | 37%  | 0%   | 0%   | 0%     |
| PHA 665752           | 28     | 12%          | 12%        | 0%           | 7%   | 0%   | 7%   | 32%  | 13%  | 14%  | 25%  | 2%   | 0%   | 23%    |
| GW 843682X           | 29     | 10%          | 0%         | 23%          | 0%   | 4%   | 11%  | 10%  | 27%  | 30%  | 59%  | 4%   | 0%   | 15%    |
| Flavopiridol         | 30     | 0%           | 0%         | 35%          | 0%   | 1%   | 8%   | 19%  | 8%   | 2%   | 2%   | 0%   | 0%   | 11%    |
| GW 5074              | 31     | 5%           | 10%        | 0%           | 0%   | 4%   | 11%  | 23%  | 12%  | 14%  | 19%  | 10%  | 0%   | 0%     |
| LY 364947            | 32     | 4%           | 0%         | 1%           | 0%   | 7%   | 5%   | 0%   | 0%   | 0%   | 0%   | 0%   | 0%   | 8%     |
| Gefitinib            | 33     | 9%           | 0%         | 2%           | 0%   | 0%   | 7%   | 0%   | 0%   | 0%   | 0%   | 0%   | 3%   | 0%     |
| (-)-terreic acid     | 34     | 0%           | 7%         | 0%           | 0%   | 0%   | 0%   | 5%   | 0%   | 0%   | 5%   | 0%   | 1%   | 36%    |
| SB 239063            | 35     | 9%           | 0%         | 6%           | 0%   | 12%  | 11%  | 0%   | 0%   | 0%   | 0%   | 0%   | 0%   | 40%    |
| SB 203580            | 36     | 0%           | 5%         | 0%           | 0%   | 0%   | 0%   | 0%   | 2%   | 3%   | 0%   | 0%   | 0%   | 36%    |
| Ro 08-2750           | 37     | 9%           | 8%         | 5%           | 0%   | 0%   | 2%   | 0%   | 0%   | 8%   | 1%   | 3%   | 0%   | 18%    |
| Rotlerin             | 38     | 26%          | 0%         | 9%           | 0%   | 0%   | 16%  | 0%   | 4%   | 9%   | 13%  | 20%  | 0%   | 23%    |
| SB 415286            | 39     | 0%           | 2%         | 0%           | 0%   | 0%   | 2%   | 7%   | 0%   | 0%   | 9%   | 0%   | 0%   | 0%     |
| SB 216763            | 40     | 2%           | 0%         | 3%           | 11%  | 0%   | 1%   | 21%  | 0%   | 1%   | 0%   | 0%   | 0%   | 0%     |
| Roscovitine          | 41     | 0%           | 0%         | 0%           | 0%   | 0%   | 0%   | 20%  | 0%   | 0%   | 0%   | 0%   | 0%   | 0%     |
| Olomoucine           | 42     | 0%           | 0%         | 0%           | 0%   | 6%   | 7%   | 0%   | 0%   | 0%   | 0%   | 0%   | 0%   | 0%     |
| API-2                | 43     | 4%           | 0%         | 0%           | 0%   | 0%   | 6%   | 0%   | 0%   | 0%   | 1%   | 0%   | 0%   | 0%     |
| TBB                  | 44     | 0%           | 0%         | 0%           | 0%   | 0%   | 2%   | 0%   | 3%   | 4%   | 6%   | 0%   | 0%   | 4%     |
| Arctigenin           | 45     | 0%           | 0%         | 0%           | 0%   | 0%   | 0%   | 2%   | 6%   | 0%   | 12%  | 7%   | 1%   | 15%    |
| ER 27319             | 46     | 0%           | 0%         | 0%           | 0%   | 1%   | 5%   | 3%   | 0%   | 0%   | 0%   | 0%   | 3%   | 12%    |
| 10-DEBC              | 47     | 0%           | 0%         | 4%           | 2%   | 6%   | 7%   | 0%   | 0%   | 7%   | 0%   | 0%   | 0%   | 0%     |
| SP 600125            | 48     | 0%           | 0%         | 0%           | 0%   | 4%   | 0%   | 0%   | 0%   | 0%   | 0%   | 2%   | 0%   | 0%     |
| ZM 336372            | 49     | 0%           | 0%         | 0%           | 0%   | 0%   | 0%   | 0%   | 0%   | 0%   | 0%   | 0%   | 0%   | 0%     |
| ZM 39923             | 50     | 0%           | 0%         | 0%           | 0%   | 0%   | 0%   | 0%   | 0%   | 0%   | 0%   | 0%   | 0%   | 0%     |
| ZM 449829            | 51     | 0%           | 0%         | 0%           | 0%   | 2%   | 0%   | 0%   | 0%   | 0%   | 0%   | 0%   | 0%   | 0%     |
| GW 583340            | 52     | 10%          | 6%         | 0%           | 0%   | 0%   | 7%   | 14%  | 0%   | 0%   | 5%   | 11%  | 6%   | 9%     |
| hexabromocyclohexane | 53     | 6%           | 0%         | 0%           | 0%   | 7%   | 6%   | 0%   | 0%   | 0%   | 0%   | 0%   | 0%   | 3%     |
| U0126                | 54     | 0%           | 0%         | 0%           | 3%   | 0%   | 0%   | 0%   | 0%   | 0%   | 0%   | 0%   | 0%   | 0%     |
| AG 213               | 55     | 0%           | 0%         | 0%           | 0%   | 5%   | 0%   | 0%   | 0%   | 0%   | 0%   | 0%   | 0%   | 1%     |
| AG 490               | 56     | 0%           | 0%         | 0%           | 0%   | 0%   | 0%   | 0%   | 0%   | 0%   | 0%   | 0%   | 0%   | 0%     |
| LFM-A13              | 57     | 0%           | 0%         | 0%           | 0%   | 0%   | 0%   | 0%   | 0%   | 0%   | 0%   | 0%   | 0%   | 0%     |
| SL 327               | 58     | 0%           | 0%         | 0%           | 0%   | 6%   | 11%  | 0%   | 0%   | 0%   | 0%   | 0%   | 4%   | 0%     |
| IMD 0354             | 59     | 6%           | 8%         | 2%           | 0%   | 0%   | 4%   | 1%   | 0%   | 0%   | 0%   | 0%   | 1%   | 11%    |
| D 4476               | 60     | 0%           | 0%         | 1%           | 1%   | 0%   | 0%   | 0%   | 0%   | 0%   | 5%   | 3%   | 1%   | 0%     |
| SB 431542            | 61     | 0%           | 0%         | 0%           | 0%   | 0%   | 1%   | 0%   | 0%   | 3%   | 0%   | 0%   | 0%   | 0%     |
| SB 202190            | 62     | 0%           | 0%         | 0%           | 0%   | 0%   | 13%  | 0%   | 0%   | 0%   | 0%   | 0%   | 0%   | 11%    |
| SC 514               | 63     | 0%           | 11%        | 0%           | 0%   | 0%   | 0%   | 0%   | 0%   | 0%   | 24%  | 0%   | 0%   | 0%     |
| PQ 401               | 64     | 0%           | 0%         | 0%           | 0%   | 0%   | 1%   | 0%   | 0%   | 0%   | 0%   | 0%   | 0%   | 0%     |
| CGK 733              | 65     | 15%          | 7%         | 0%           | 0%   | 0%   | 4%   | 2%   | 0%   | 2%   | 4%   | 3%   | 0%   | 8%     |
| ZM 323881            | 66     | 1%           | 0%         | 0%           | 5%   | 0%   | 1%   | 0%   | 0%   | 0%   | 0%   | 0%   | 0%   | 16%    |
| ZM 306416            | 67     | 2%           | 11%        | 7%           | 0%   | 1%   | 7%   | 0%   | 8%   | 0%   | 0%   | 7%   | 7%   | 14%    |
| BIBX 1382            | 68     | 0%           | 0%         | 0%           | 0%   | 3%   | 6%   | 0%   | 0%   | 4%   | 0%   | 0%   | 0%   | 0%     |
| LY 294002            | 69     | 0%           | 0%         | 0%           | 0%   | 0%   | 0%   | 16%  | 0%   | 0%   | 0%   | 0%   | 0%   | 0%     |
| NU 7026              | 70     | 3%           | 0%         | 0%           | 0%   | 0%   | 0%   | 0%   | 0%   | 0%   | 0%   | 0%   | 0%   | 0%     |
| PI 828               | 71     | 0%           | 1%         | 0%           | 0%   | 0%   | 2%   | 0%   | 0%   | 0%   | 0%   | 0%   | 0%   | 0%     |
| Compound 401         | 72     | 0%           | 0%         | 0%           | 0%   | 0%   | 0%   | 0%   | 0%   | 0%   | 0%   | 0%   | 0%   | 0%     |
| EO 1428              | 73     | 0%           | 0%         | 0%           | 0%   | 0%   | 0%   | 0%   | 0%   | 0%   | 0%   | 0%   | 0%   | 0%     |
| PD 198306            | 74     | 12%          | 0%         | 1%           | 0%   | 0%   | 6%   | 6%   | 0%   | 0%   | 0%   | 0%   | 2%   | 0%     |

**Figure S1.** Structures of 8 compounds found to exhibit activity against a Fos-Nfluc/Cfluc-Jun control and excluded from the final inhibitor analysis.

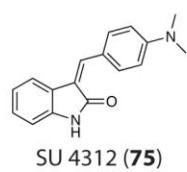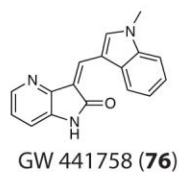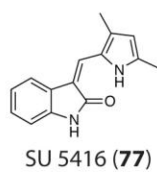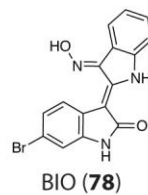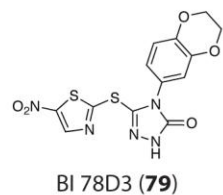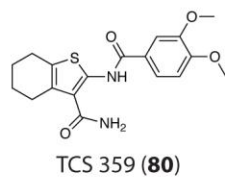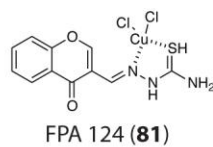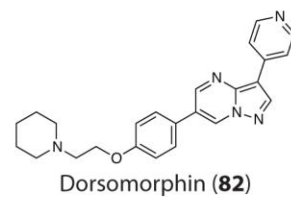



**Table S4.** Kinase domain *F* values calculated for each kinase. The averages and corresponding group numbers were used to plot Figure 7A. The percent identity cutoffs used to achieve each number of groups is also listed, with the “9” group data highlighted in green.

| Number Identity of Groups | Cutoff | MSK1 | MSK2 | RSK1 | RSK2 | RSK3 | RSK4 | AKT1 | AKT2 | AKT3 | SGK2 | SGK3 | PKCδ | PKCθ | PKCε | PKCη | PKCγ | PKN1 |
|---------------------------|--------|------|------|------|------|------|------|------|------|------|------|------|------|------|------|------|------|------|
| 27                        | 100    | 100% | 100% | 100% | 100% | 100% | 100% | 100% | 100% | 100% | 100% | 100% | 100% | 100% | 100% | 100% | 100% | 100% |
| 26                        | 95     | 100% | 100% | 100% | 100% | 100% | 100% | 100% | 100% | 100% | 100% | 100% | 100% | 100% | 100% | 100% | 100% | 100% |
| 25                        | 92     | 100% | 100% | 100% | 88%  | 88%  | 100% | 100% | 100% | 100% | 100% | 100% | 100% | 100% | 100% | 100% | 100% | 100% |
| 23                        | 91     | 100% | 100% | 100% | 78%  | 78%  | 78%  | 100% | 100% | 100% | 100% | 100% | 100% | 100% | 100% | 100% | 100% | 100% |
| 22                        | 90     | 100% | 100% | 75%  | 75%  | 75%  | 75%  | 100% | 100% | 100% | 100% | 100% | 100% | 100% | 100% | 100% | 100% | 100% |
| 21                        | 89     | 100% | 100% | 75%  | 75%  | 75%  | 75%  | 89%  | 89%  | 89%  | 100% | 100% | 100% | 100% | 100% | 100% | 100% | 100% |
| 20                        | 85     | 100% | 100% | 75%  | 75%  | 75%  | 75%  | 89%  | 89%  | 89%  | 100% | 100% | 100% | 100% | 100% | 100% | 100% | 100% |
| 17                        | 76     | 100% | 100% | 75%  | 75%  | 75%  | 75%  | 89%  | 89%  | 89%  | 88%  | 88%  | 64%  | 64%  | 77%  | 77%  | 100% | 100% |
| 15                        | 74     | 85%  | 85%  | 75%  | 75%  | 75%  | 75%  | 89%  | 89%  | 89%  | 88%  | 88%  | 64%  | 64%  | 77%  | 77%  | 100% | 100% |
| 14                        | 63     | 85%  | 85%  | 75%  | 75%  | 75%  | 75%  | 89%  | 89%  | 89%  | 88%  | 88%  | 64%  | 64%  | 58%  | 58%  | 100% | 100% |
| 13                        | 60     | 85%  | 85%  | 75%  | 75%  | 75%  | 75%  | 89%  | 89%  | 89%  | 88%  | 88%  | 46%  | 46%  | 46%  | 46%  | 100% | 100% |
| 12                        | 57     | 68%  | 68%  | 68%  | 68%  | 68%  | 68%  | 89%  | 89%  | 89%  | 88%  | 88%  | 46%  | 46%  | 46%  | 46%  | 100% | 100% |
| 11                        | 56     | 68%  | 68%  | 68%  | 68%  | 68%  | 68%  | 89%  | 89%  | 89%  | 88%  | 88%  | 46%  | 46%  | 46%  | 46%  | 100% | 100% |
| 10                        | 55     | 68%  | 68%  | 68%  | 68%  | 68%  | 68%  | 60%  | 60%  | 60%  | 60%  | 60%  | 46%  | 46%  | 46%  | 46%  | 100% | 100% |
| 9                         | 54     | 68%  | 68%  | 68%  | 68%  | 68%  | 68%  | 60%  | 60%  | 60%  | 60%  | 60%  | 39%  | 39%  | 39%  | 39%  | 39%  | 39%  |
| 8                         | 53     | 68%  | 68%  | 68%  | 68%  | 68%  | 68%  | 37%  | 37%  | 37%  | 37%  | 37%  | 37%  | 37%  | 37%  | 37%  | 37%  | 37%  |
| 6                         | 49     | 35%  | 35%  | 35%  | 35%  | 35%  | 35%  | 35%  | 35%  | 35%  | 35%  | 35%  | 35%  | 35%  | 35%  | 35%  | 35%  | 35%  |
| 5                         | 47     | 30%  | 30%  | 30%  | 30%  | 30%  | 30%  | 30%  | 30%  | 30%  | 30%  | 30%  | 30%  | 30%  | 30%  | 30%  | 30%  | 30%  |
| 4                         | 39     | 29%  | 29%  | 29%  | 29%  | 29%  | 29%  | 29%  | 29%  | 29%  | 29%  | 29%  | 29%  | 29%  | 29%  | 29%  | 29%  | 29%  |
| 2                         | 38     | 25%  | 25%  | 25%  | 25%  | 25%  | 25%  | 25%  | 25%  | 25%  | 25%  | 25%  | 25%  | 25%  | 25%  | 25%  | 25%  | 25%  |
| 1                         | 36     | 22%  | 22%  | 22%  | 22%  | 22%  | 22%  | 22%  | 22%  | 22%  | 22%  | 22%  | 22%  | 22%  | 22%  | 22%  | 22%  | 22%  |

  

| Number Identity of Groups | Cutoff | PKA  | PKAβ | PRKX | PKG1 | PDK1 | DMPK | AURKA | AURKB | AURKC | STK32B | Average |
|---------------------------|--------|------|------|------|------|------|------|-------|-------|-------|--------|---------|
| 27                        | 100    | 100% | 100% | 100% | 100% | 100% | 100% | 100%  | 100%  | 100%  | 100%   | 100%    |
| 26                        | 95     | 78%  | 78%  | 100% | 100% | 100% | 100% | 100%  | 100%  | 100%  | 100%   | 98%     |
| 25                        | 92     | 78%  | 78%  | 100% | 100% | 100% | 100% | 100%  | 100%  | 100%  | 100%   | 97%     |
| 23                        | 91     | 78%  | 78%  | 100% | 100% | 100% | 100% | 100%  | 100%  | 100%  | 100%   | 96%     |
| 22                        | 90     | 78%  | 78%  | 100% | 100% | 100% | 100% | 100%  | 100%  | 100%  | 100%   | 95%     |
| 21                        | 89     | 78%  | 78%  | 100% | 100% | 100% | 100% | 100%  | 100%  | 100%  | 100%   | 93%     |
| 20                        | 85     | 78%  | 78%  | 100% | 100% | 100% | 100% | 100%  | 79%   | 79%   | 100%   | 92%     |
| 17                        | 76     | 78%  | 78%  | 100% | 100% | 100% | 100% | 100%  | 79%   | 79%   | 100%   | 87%     |
| 15                        | 74     | 78%  | 78%  | 100% | 100% | 100% | 100% | 57%   | 57%   | 57%   | 100%   | 82%     |
| 14                        | 63     | 78%  | 78%  | 100% | 100% | 100% | 100% | 57%   | 57%   | 57%   | 100%   | 79%     |
| 13                        | 60     | 78%  | 78%  | 100% | 100% | 100% | 100% | 57%   | 57%   | 57%   | 100%   | 77%     |
| 12                        | 57     | 78%  | 78%  | 100% | 100% | 100% | 100% | 57%   | 57%   | 57%   | 100%   | 74%     |
| 11                        | 56     | 69%  | 69%  | 69%  | 100% | 100% | 100% | 57%   | 57%   | 57%   | 100%   | 72%     |
| 10                        | 55     | 69%  | 69%  | 69%  | 100% | 100% | 100% | 57%   | 57%   | 57%   | 100%   | 67%     |
| 9                         | 54     | 69%  | 69%  | 69%  | 100% | 100% | 100% | 57%   | 57%   | 57%   | 100%   | 64%     |
| 8                         | 53     | 69%  | 69%  | 69%  | 100% | 100% | 100% | 57%   | 57%   | 57%   | 100%   | 59%     |
| 6                         | 49     | 59%  | 59%  | 59%  | 100% | 100% | 100% | 57%   | 57%   | 57%   | 100%   | 48%     |
| 5                         | 47     | 30%  | 30%  | 30%  | 100% | 100% | 100% | 57%   | 57%   | 57%   | 100%   | 41%     |
| 4                         | 39     | 29%  | 29%  | 29%  | 100% | 100% | 29%  | 57%   | 57%   | 57%   | 100%   | 37%     |
| 2                         | 38     | 25%  | 25%  | 25%  | 100% | 25%  | 25%  | 57%   | 57%   | 57%   | 100%   | 28%     |
| 1                         | 36     | 22%  | 22%  | 22%  | 22%  | 22%  | 22%  | 22%   | 22%   | 22%   | 22%    | 22%     |





**Table S6.** Active site *F* values calculated for each kinase. The averages and corresponding group numbers were used to plot Figure 7A. The percent identity cutoffs used to achieve each number of groups is also listed, with the “9” group data highlighted in green.

| Number Identity of Groups | Cutoff | MSK1 | MSK2 | RSK1 | RSK2 | RSK3 | RSK4 | AKT1 | AKT2 | AKT3 | SGK2 | SGK3 | PKCδ | PKCθ | PKCε | PKCη | PKCγ | PKN1 |
|---------------------------|--------|------|------|------|------|------|------|------|------|------|------|------|------|------|------|------|------|------|
| 27                        | N/A    | 100% | 100% | 100% | 100% | 100% | 100% | 100% | 100% | 100% | 100% | 100% | 100% | 100% | 100% | 100% | 100% | 100% |
| 23                        | 100    | 100% | 100% | 80%  | 80%  | 100% | 80%  | 100% | 100% | 100% | 100% | 100% | 100% | 100% | 100% | 100% | 100% | 100% |
| 19                        | 97     | 100% | 100% | 75%  | 75%  | 75%  | 75%  | 100% | 100% | 100% | 100% | 100% | 64%  | 64%  | 77%  | 77%  | 100% | 100% |
| 16                        | 94     | 85%  | 85%  | 75%  | 75%  | 75%  | 75%  | 89%  | 89%  | 89%  | 100% | 100% | 64%  | 64%  | 77%  | 77%  | 100% | 100% |
| 13                        | 91     | 85%  | 85%  | 75%  | 75%  | 75%  | 75%  | 89%  | 89%  | 89%  | 88%  | 88%  | 46%  | 46%  | 46%  | 46%  | 46%  | 100% |
| 11                        | 85     | 65%  | 65%  | 75%  | 75%  | 75%  | 75%  | 89%  | 89%  | 89%  | 65%  | 65%  | 46%  | 46%  | 46%  | 46%  | 46%  | 100% |
| 9                         | 82     | 55%  | 55%  | 55%  | 55%  | 55%  | 55%  | 49%  | 49%  | 49%  | 55%  | 55%  | 49%  | 49%  | 49%  | 49%  | 49%  | 100% |
| 4                         | 76     | 29%  | 29%  | 29%  | 29%  | 29%  | 29%  | 29%  | 29%  | 29%  | 29%  | 29%  | 29%  | 29%  | 29%  | 29%  | 29%  | 29%  |
| 2                         | 73     | 25%  | 25%  | 25%  | 25%  | 25%  | 25%  | 25%  | 25%  | 25%  | 25%  | 25%  | 25%  | 25%  | 25%  | 25%  | 25%  | 25%  |
| 1                         | 70     | 22%  | 22%  | 22%  | 22%  | 22%  | 22%  | 22%  | 22%  | 22%  | 22%  | 22%  | 22%  | 22%  | 22%  | 22%  | 22%  | 22%  |

| Number Identity of Groups | Cutoff | PKA  | PKAβ | PRKX | PKG1 | PDK1 | DMPK | AURKA | AURKB | AURKC | STK32B | Average |
|---------------------------|--------|------|------|------|------|------|------|-------|-------|-------|--------|---------|
| 27                        | N/A    | 100% | 100% | 100% | 100% | 100% | 100% | 100%  | 100%  | 100%  | 100%   | 100%    |
| 23                        | 100    | 100% | 100% | 100% | 100% | 100% | 100% | 100%  | 79%   | 79%   | 100%   | 96%     |
| 19                        | 97     | 78%  | 78%  | 100% | 100% | 100% | 100% | 100%  | 79%   | 79%   | 100%   | 89%     |
| 16                        | 94     | 78%  | 78%  | 100% | 100% | 100% | 100% | 57%   | 57%   | 57%   | 100%   | 83%     |
| 13                        | 91     | 78%  | 78%  | 100% | 100% | 100% | 100% | 57%   | 57%   | 57%   | 100%   | 77%     |
| 11                        | 85     | 69%  | 69%  | 69%  | 100% | 100% | 100% | 57%   | 57%   | 57%   | 100%   | 72%     |
| 9                         | 82     | 69%  | 69%  | 69%  | 100% | 100% | 100% | 57%   | 57%   | 57%   | 100%   | 63%     |
| 4                         | 76     | 29%  | 29%  | 29%  | 29%  | 29%  | 100% | 57%   | 57%   | 57%   | 100%   | 37%     |
| 2                         | 73     | 25%  | 25%  | 25%  | 25%  | 25%  | 25%  | 25%   | 25%   | 25%   | 100%   | 28%     |
| 1                         | 70     | 22%  | 22%  | 22%  | 22%  | 22%  | 22%  | 22%   | 22%   | 22%   | 22%    | 22%     |
